# Supplementary material for: Sebaceous gland abnormalities in fatty acyl CoA reductase 2 (Far2) null mice result in primary cicatricial alopecia
Source: PubMed Central journal article supplement (PMC6205590; doi:10.1371/journal.pone.0205775), 2018-10-29
Supplement: pone.0205775.s001.pdf [file pone.0205775.s001.pdf]

Table S1. The significantly changed skin lipids between *Far2* null mice and wildtype (N=10).

| Lipid name         | INCHIKEY                     | Raw p-value | FDR p-value | Fold Change (FC=null/WT) | Log2(FC)   |
|--------------------|------------------------------|-------------|-------------|--------------------------|------------|
| AC 19:0            | GWKZIORVZQMVMC-UHFFFAOYNA-O  | 0.000       | 0.001       | 4.2                      | 2.1        |
| AC 20:0            | SVLJQBGUITFLI-UHFFFAOYNA-O   | 0.000       | 0.001       | 6.6                      | 2.7        |
| AC 20:2            | OLZWDVKTGTGLVC-UTJQPWESNA-O  | 0.007       | 0.016       | 0.6                      | -0.7       |
| CE 18:2            | NAACPBBOTFFYQB-LJAITQKLSA-N  | 0.000       | 0.001       | 3.0                      | 1.6        |
| Cer(d17:1/16:1)    | WPFUBVVMOSGKHP-CBLABHCTNA-N  | 0.001       | 0.003       | 3.3                      | 1.7        |
| Cer(d17:1/18:2)    | WVGQIXEGMIOFM-QCSXBKGRNA-N   | 0.000       | 0.001       | 2.7                      | 1.4        |
| Cer(d17:1/20:0)    | CZKJGFHQZINDHS-NHOGMKOONA-N  | 0.000       | 0.000       | 6.1                      | 2.6        |
| Cer(d17:1/22:0)    | NHEGYDMFDPAEY-NWBJSICNA-N    | 0.000       | 0.001       | 6.2                      | 2.6        |
| Cer(d17:1/30:0)    | CCLRBUCIGBPXLN-MZBAEZDSNA-N  | 0.000       | 0.001       | 4.8                      | 2.3        |
| Cer(d18:1/15:1)    | OAFLTWKJXZGYSZ-MANHSESENA-N  | 0.003       | 0.007       | 3.5                      | 1.8        |
| Cer(d18:1/16:1)    | BCZGPAUIAZZGTF-HSCORPAWNA-N  | 0.005       | 0.013       | 3.4                      | 1.8        |
| Cer(d18:1/18:0)    | VODZWVMEJITOND-OWWNRXNENA-N  | 0.005       | 0.013       | 2.2                      | 1.1        |
| Cer(d18:1/18:1)    | TZXPILCVLWMMNW-DXXMRVLLNA-N  | 0.000       | 0.000       | 9.2                      | 3.2        |
| Cer(d18:1/19:0)    | SNMLDULOFHAZRC-NHOGMKOONA-N  | 0.001       | 0.002       | 2.8                      | 1.5        |
| Cer(d18:1/20:0)    | XWBWIAOWSABHFI-QOSDPKFLNA-N  | 0.009       | 0.020       | 2.3                      | 1.2        |
| Cer(d18:1/22:0)    | KEPOASGDIXEIL-LAPDZXRHNA-N   | 0.012       | 0.026       | 3.2                      | 1.7        |
| Cer(d18:1/22:1)    | OINPSEGBLVAKZ-MBXZFYGDNA-N   | 0.002       | 0.006       | 3.7                      | 1.9        |
| Cer(d18:1/26:1)    | IBJXLRPUPTQCS-SJWJHEOENA-N   | 0.015       | 0.032       | 2.6                      | 1.4        |
| Cer(d18:1/28:0)    | NEUDBTFZYJPMG-OHYVAXEENA-N   | 0.002       | 0.004       | 3.2                      | 1.7        |
| Cer(d18:1/30:0)    | YTMJWJKIOCDQT-BOMCYIUANA-N   | 0.000       | 0.000       | 8.2                      | 3.0        |
| Cer(d18:2/16:1)    | CJIOFRYYRFSRB-UXKQDCHNA-N    | 0.001       | 0.002       | 7.3                      | 2.9        |
| Cer(d18:2/23:0)    | VYMF SKMDQVDKIS-QCVIXQMPNA-N | 0.015       | 0.032       | 2.5                      | 1.3        |
| Cer(d18:2/26:0)    | ZLOXRQZQDQOQB-NBGJCBLSNA-N   | 0.001       | 0.002       | 4.5                      | 2.2        |
| DG(16:0/18:3)      | UHPKYXAUVOQHLSVNLQWEDNA-N    | 0.000       | 0.001       | 2.2                      | 1.1        |
| DG(16:1/18:2)      | BHGPPCIWDXQOMA-RUGCENDANA-N  | 0.000       | 0.001       | 2.2                      | 1.1        |
| DG(18:0/18:2)      | AJMZUFBKADIAC-MLWYCKJNA-N    | 0.000       | 0.000       | 1.8                      | 0.9        |
| DG(18:1/18:2)      | BLZVZPYMHLXHG-ROIEFAZNA-N    | 0.000       | 0.001       | 2.9                      | 1.6        |
| DG(18:2/18:3)      | PGXBELOFNRPKBC-DYXURTGNA-N   | 0.000       | 0.001       | 2.4                      | 1.3        |
| DG(20:0/18:2)      | PAZSROGSZMWHFZ-ZARXLEVNA-N   | 0.000       | 0.001       | 1.8                      | 0.9        |
| DG(22:1/18:2)      | ZLOICTBXADUIDP-YZCPKFINA-N   | 0.000       | 0.001       | 8.4                      | 3.1        |
| FA 16:1            | PJHOFUXBXJNUAC-KTKRTGZSA-N   | 0.007       | 0.016       | 0.7                      | -0.5       |
| FA 16:3            | HECRUYRDPYOG-LCOXHLGSLA-N    | 0.023       | 0.049       | 0.2                      | -2.0       |
| FA 17:1            | FJMPAYNWWWCODA-KHPPVWFESA-N  | 0.019       | 0.040       | 0.8                      | -0.3       |
| FA 18:1            | UWHZIFQPPBDJPM-FPLPWBLSA-N   | 0.009       | 0.020       | 0.7                      | -0.5       |
| FA 19:0            | ISWECDDZWTFF-UHFFFAOYSA-N    | 0.000       | 0.000       | 3.2                      | 1.7        |
| FA 20:0            | VKOBVWXKNCXDE-UHFFFAOYSA-N   | 0.000       | 0.000       | 4.1                      | 2.0        |
| FA 20:5            | JAZBEHYOTIENJ-JLNKOSITSA-N   | 0.000       | 0.000       | 1.8                      | 0.9        |
| FA 20:6            | PWIBDJLBEKARAO-LJGOLAKSA-N   | 0.003       | 0.007       | 1.5                      | 0.6        |
| FA 21:0            | CKDRHZIAZRBW-UHFFFAOYSA-N    | 0.000       | 0.000       | 3.7                      | 1.9        |
| FA 22:0            | UKMSJUNONTPOPIO-UHFFFAOYSA-N | 0.000       | 0.000       | 5.8                      | 2.5        |
| FA 22:1            | KJZDZTDNIULBE-VAWYXSNFSA-N   | 0.000       | 0.001       | 1.7                      | 0.8        |
| FA 22:4            | IGFLWHIPPADNDL-GFRMADBLSA-N  | 0.002       | 0.006       | 1.8                      | 0.8        |
| FA 22:5            | YUFFSWSGQGVEMMI-RCHUDCCISA-N | 0.001       | 0.003       | 0.6                      | -0.8       |
| LysoPC 16:0        | ASWBKHCZGOVJV-UHFFFAOYNA-N   | 0.000       | 0.000       | 6.6                      | 2.7        |
| LysoPC 18:0        | IHNKQIMGVNPMTC-UHFFFAOYNA-N  | 0.000       | 0.000       | 6.6                      | 2.7        |
| LysoPC 18:1        | YAMUFLWGFIFCM-SEYXRHONNA-N   | 0.000       | 0.001       | 4.6                      | 2.2        |
| LysoPC 18:2        | SPJFYJXNPEZDW-UTJQPWESNA-N   | 0.000       | 0.000       | 5.8                      | 2.5        |
| LysoPC 20:5        | PDIGSOAOQXRDU-WMPRHZHDNA-N   | 0.002       | 0.006       | Indefinite               | Indefinite |
| PC(16:0/20:4)      | JAVWFBAAZSHHAD-KKILVCFNA-N   | 0.021       | 0.045       | 2.2                      | 1.1        |
| SM(d14:0/20:0)     | BLHKKMGMTNRNHM-UHFFFAOYNA-N  | 0.007       | 0.016       | 2.9                      | 1.5        |
| SM(d14:0/21:1)     | LDJGVBPCOLCJN-DORAZIAONA-N   | 0.000       | 0.001       | 2.7                      | 1.4        |
| TG(12:0/18:2/18:2) | MVLRQPTTJFJW-ZHSZNRPNNA-N    | 0.002       | 0.004       | 3.2                      | 1.7        |
| TG(14:0/16:0/18:2) | HUAFGDPJQVZKZ-TXMEPEPYNA-N   | 0.000       | 0.000       | 3.1                      | 1.7        |
| TG(14:0/16:0/18:3) | DPOXSBSJPQZQK-AAPVPQOHNA-N   | 0.004       | 0.010       | 1.7                      | 0.7        |
| TG(14:0/18:1/18:2) | JRCFMQNYMNGHGRD-PUWPDQZNA-N  | 0.000       | 0.001       | 2.5                      | 1.3        |
| TG(14:0/18:1/20:5) | YYZOTXFUVAQSS-MIMRAKPYNA-N   | 0.001       | 0.003       | 2.1                      | 1.1        |
| TG(14:0/18:2/18:2) | IPZYMBZEKSFQULHMLETAINA-N    | 0.000       | 0.000       | 3.0                      | 1.6        |
| TG(14:0/18:2/18:3) | GLRVHWCFJRDSOX-DTIWKLIMNA-N  | 0.002       | 0.006       | 3.3                      | 1.7        |
| TG(15:0/18:1/20:1) | NEKSMCMHOJEPMZ-NJDMNPJTNA-N  | 0.000       | 0.000       | 3.1                      | 1.6        |
| TG(15:0/18:2/18:2) | DRFFNCCYRJRHR-HTUQOFBENA-N   | 0.000       | 0.000       | 4.4                      | 2.1        |
| TG(16:0/16:0/16:1) | IXWOOZEHUDEZ-FVDSYPCUNA-N    | 0.000       | 0.000       | 2.8                      | 1.5        |
| TG(16:0/16:0/18:0) | DOKMNCNZGAXXZ-UHFFFAOYNA-N   | 0.000       | 0.001       | 4.3                      | 2.1        |
| TG(16:0/16:0/18:1) | ZKEWGTVAIGNBK-QOCHGBHMNA-N   | 0.000       | 0.000       | 2.3                      | 1.2        |
| TG(16:0/16:0/18:2) | KELZWJUGNROKO-OCGDUTRDNA-N   | 0.000       | 0.000       | 2.8                      | 1.5        |
| TG(16:0/16:0/20:4) | FTMDHBKIGZUTJX-MFRLLHNRNA-N  | 0.000       | 0.000       | 3.0                      | 1.6        |
| TG(16:0/16:1/17:0) | SORUPHBMMAHYOI-QVTSOHHYNA-N  | 0.000       | 0.000       | 5.1                      | 2.4        |
| TG(16:0/17:0/18:2) | SEIGBQZTRJHNU-OCGDUTRDNA-N   | 0.000       | 0.000       | 4.3                      | 2.1        |
| TG(16:0/18:0/18:0) | SDNYRTVJOFMYIW-UHFFFAOYNA-N  | 0.000       | 0.001       | 27.6                     | 4.8        |
| TG(16:0/18:1/18:1) | NJWLXJXDVKOEOP-IKJQJQYNA-N   | 0.001       | 0.003       | 2.4                      | 1.2        |
| TG(16:0/18:1/18:2) | PFTMZNUFSPJEJR-KDHVLOFNA-N   | 0.000       | 0.001       | 4.3                      | 2.1        |
| TG(16:0/18:2/18:2) | UAWKISGGTGUMP-HTUQOFBENA-N   | 0.001       | 0.002       | 4.7                      | 2.2        |
| TG(16:0/18:2/18:3) | DWJFHJOYVJEBL-IXXGKOVNA-N    | 0.001       | 0.002       | 4.1                      | 2.0        |
| TG(16:0/18:3/20:4) | VDMGICGWNCJKMY-VQTFNCNDTNA-N | 0.000       | 0.001       | 2.4                      | 1.3        |
| TG(16:1/18:1/18:1) | LUMXEMCKOBNHRP-OQGVXIJNA-N   | 0.000       | 0.000       | 2.7                      | 1.4        |
| TG(16:1/18:2/18:3) | ZNWMQOGSGLJCNF-YOPYQNEPNA-N  | 0.003       | 0.007       | 3.0                      | 1.6        |
| TG(16:2/18:2/18:2) | GOOWHOLGCYSMJZ-RMLMUKSQNA-N  | 0.000       | 0.001       | 2.3                      | 1.2        |
| TG(17:0/18:1/18:2) | JCUUGUUCZELJG-KDHVXLOFNA-N   | 0.001       | 0.003       | 3.7                      | 1.9        |
| TG(17:0/18:2/18:2) | YWUXDKWZLDYON-HTUQOFBENA-N   | 0.000       | 0.002       | 5.6                      | 2.5        |
| TG(18:0/18:1/18:2) | YELCKHLVOPWQJ-RVWQKPPWNA-N   | 0.002       | 0.004       | 2.4                      | 1.3        |
| TG(18:0/18:1/20:0) | LXPIJWPRELJYCD-FLFOWRNMENA-N | 0.000       | 0.001       | Indefinite               | Indefinite |
| TG(18:0/20:4/20:4) | KWIGMCRWEINBIR-PUVHJDNNA-N   | 0.000       | 0.000       | 8.8                      | 3.1        |
| TG(18:1/18:1/18:2) | XIKRPLVGVJXBJH-OFACYJBGNA-N  | 0.001       | 0.003       | 4.7                      | 2.2        |
| TG(18:1/18:2/18:2) | POVFMDBGZDJLAN-BHFHPLZNA-N   | 0.000       | 0.001       | 4.2                      | 2.1        |
| TG(18:1/18:2/18:3) | PFXPBVCKXAEFP-OZOFREBONA-N   | 0.000       | 0.001       | 10.1                     | 3.3        |
| TG(18:1/20:1/22:1) | QCCDHUGMFOFIAY-AZLQJPRNA-N   | 0.000       | 0.000       | 5.5                      | 2.5        |
| TG(18:2/18:2/18:2) | YLJZNRHHYWHQC-CRDRGJOSA-N    | 0.000       | 0.001       | 4.8                      | 2.3        |
| TG(18:2/18:2/18:3) | AGCXWXICGWPOGW-FBIPNFWNA-N   | 0.000       | 0.001       | 3.3                      | 1.7        |
| TG(18:2/18:3/18:3) | XCBDYPMQVUIAE-FWPKVRRPNA-N   | 0.000       | 0.001       | 2.7                      | 1.4        |
| WE 39:2            |                              | 0.007       | 0.016       | 0.3                      | -1.8       |
